# Supplementary material for: Computational insights into substrate binding and catalytic mechanism of the glutaminase domain of glucosamine-6-phosphate synthase (GlmS)
Source: Royal Society of Chemistry journal article supplement (doi:10.1039/c7ra04906d), 2017-01-01

# Computational Insights Into Substrate Binding and Catalytic Mechanism of the Glutaminase Domain of Glucosamine-6-Phosphate Synthase (GlmS)

Wanlei Wei,<sup>1</sup> Gerald Monard,<sup>2</sup> James W. Gault<sup>1\*</sup>

<sup>1</sup> Department of Chemistry and Biochemistry, University of Windsor, Windsor, Ontario N9B  
3P4, Canada

<sup>2</sup> Université de Lorraine, UMR 7565 SRSMC, Boulevard des Aiguillettes B.P. 70239, F-54506  
Vandoeuvre-les-Nancy

## **Supporting Information**

(Figures S1 and S2; total pages 5)

\*Author to whom correspondence should be addressed. Email: gault@uwindsor.ca

**Figure S1.** The frequency of the key  $\text{Cys1S}_{\delta} \cdots \text{His71N}_{\delta}$  Distance in the GlnS simulation with positively charged N-terminal amine.

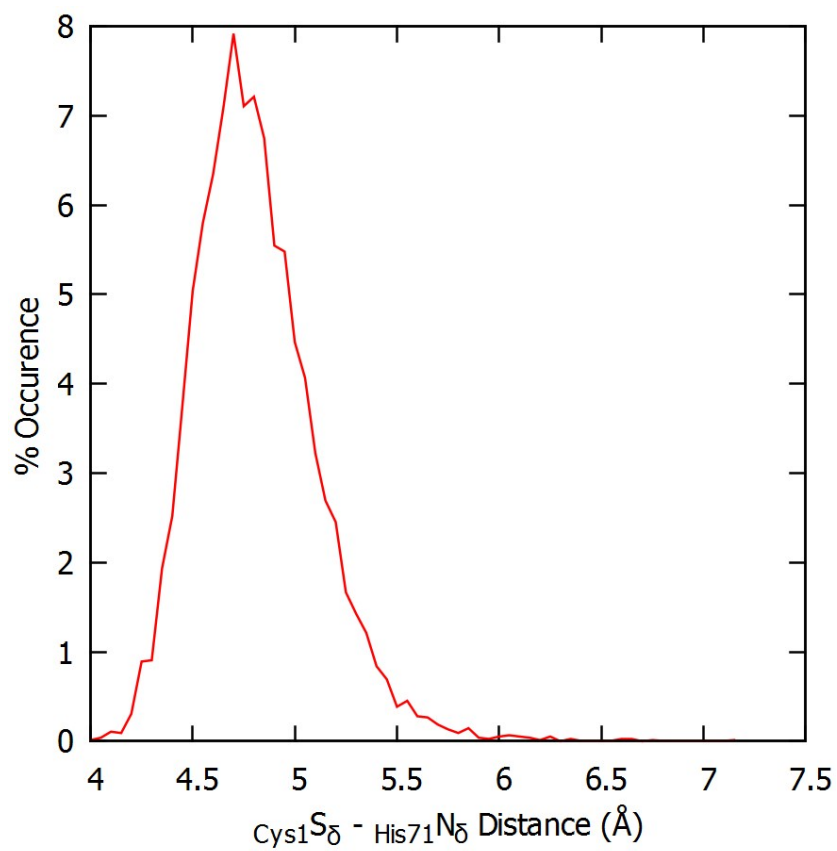

**Figure S2.** Optimized intermediates and transition state structures within the deamination site of the GlmS where the N-terminal amino group is positively charged, and a nearby His71 acts as a catalytic base.

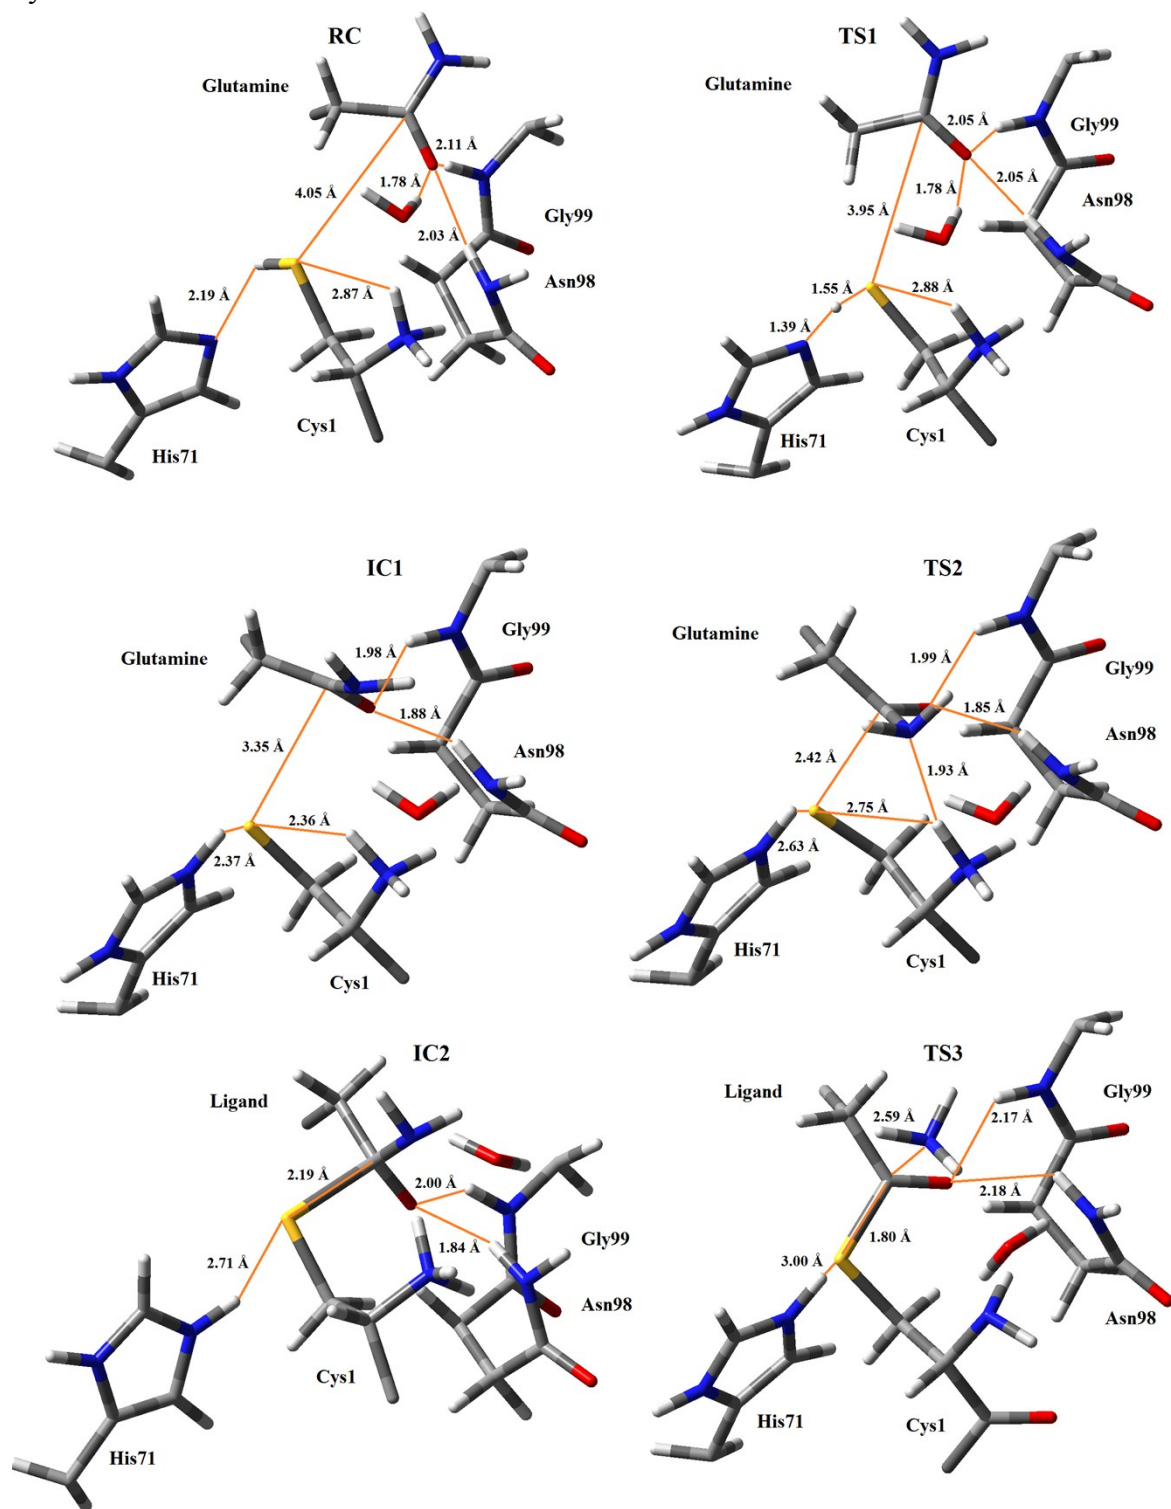

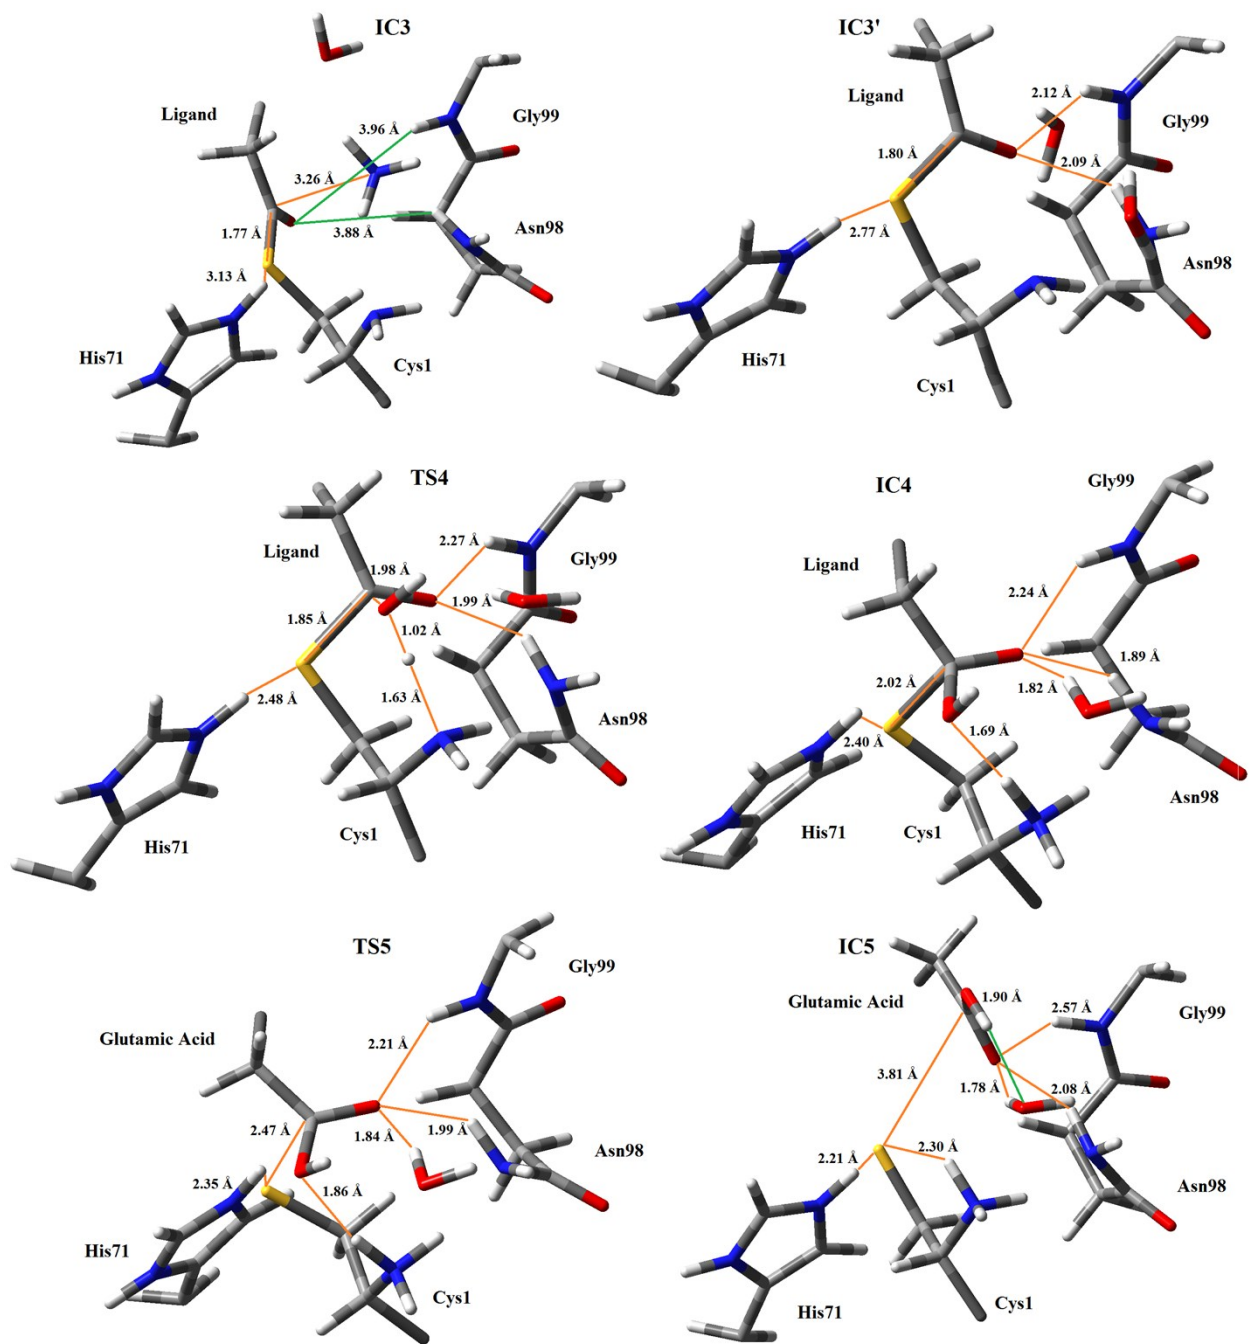

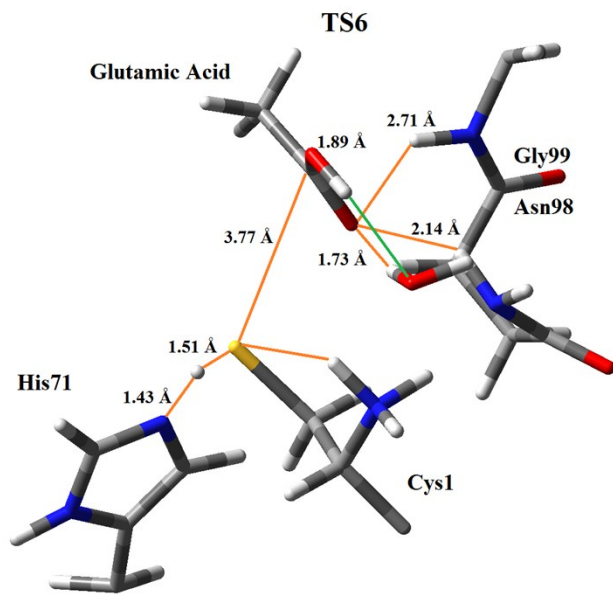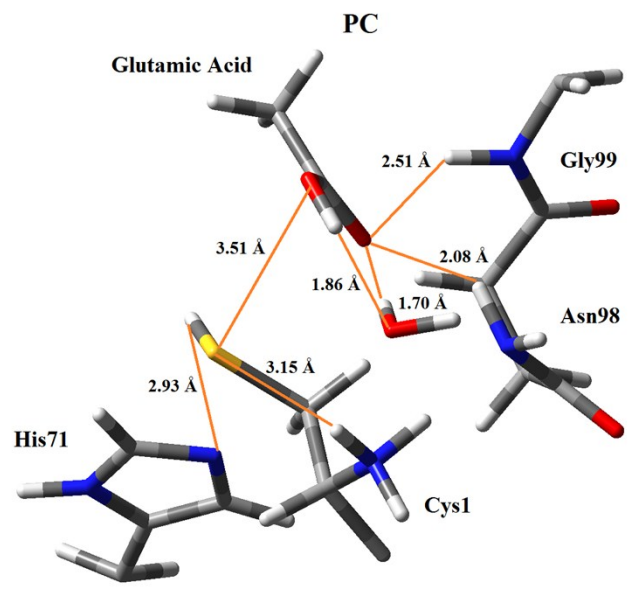

Supplement: c7ra04906d1.pdf [file c7ra04906d1.pdf]
